# Supplementary material
Source: PubMed Central journal article supplement (PMC9189571)
Supplement: sj-pdf-1-ebm-10.1177_15353702221080131.pdf [file sj-pdf-1-ebm-10.1177_15353702221080131.pdf]

**(A)**

Interleukin-11 pathway

Termination of O-glycan biosynthesis

O-linked glycosylation of mucins

Post-translational protein modification

Protein metabolism

| Name                                    | P-value  | Adjusted p-value | Odds Ratio | Combined score |
|-----------------------------------------|----------|------------------|------------|----------------|
| Interleukin-11 pathway                  | 0.001150 | 0.003250         | 19977.00   | 135204.64      |
| Termination of O-glycan biosynthesis    | 0.001300 | 0.003250         | 19974.00   | 132735.46      |
| O-linked glycosylation of mucins        | 0.003150 | 0.005250         | 19937.00   | 114844.47      |
| Post-translational protein modification | 0.009800 | 0.01225          | 19804.00   | 91601.09       |
| Protein metabolism                      | 0.02210  | 0.02210          | 19558.00   | 74558.71       |

**(B)**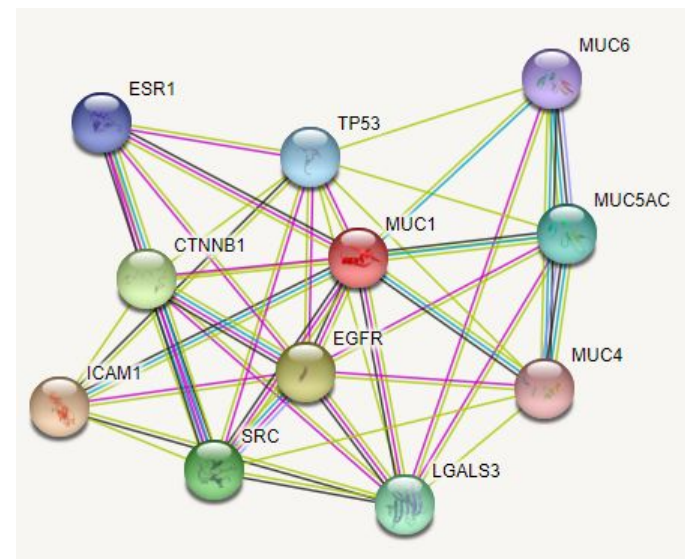

Supplementary Figure 1

- (A)** **Syndecan 1 pathway**
- Collagen biosynthesis and modifying enzymes
  - Integrins in angiogenesis
  - Extracellular matrix organization

| Name                                        | P-value  | Adjusted p-value | Odds Ratio | Combined score |
|---------------------------------------------|----------|------------------|------------|----------------|
| Syndecan 1 pathway                          | 0.002300 | 0.004650         | 19954.00   | 121217.83      |
| Collagen biosynthesis and modifying enzymes | 0.003200 | 0.004650         | 19936.00   | 114524.75      |
| Integrins in angiogenesis                   | 0.003700 | 0.004650         | 19926.00   | 111574.39      |
| Extracellular matrix organization           | 0.004650 | 0.004650         | 19907.00   | 106918.54      |

**(B)**

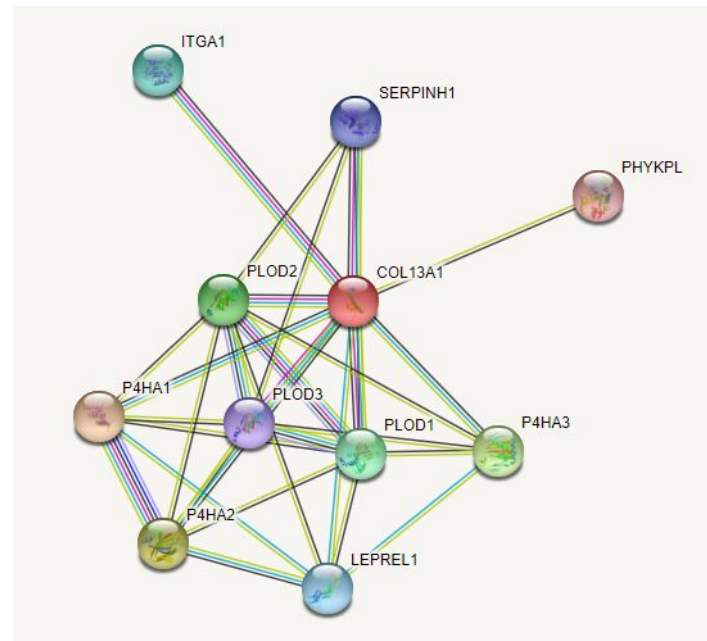

**Supplementary Figure 2**

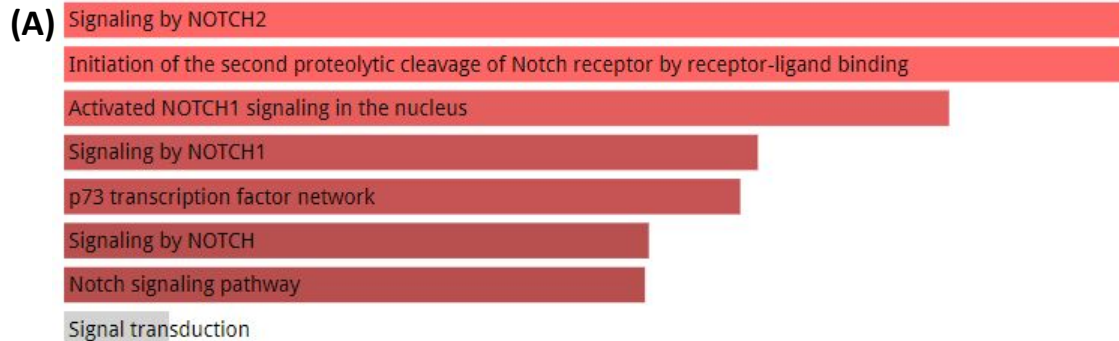

| Name                                                                                       | P-value   | Adjusted p-value | Odds Ratio | Combined score |
|--------------------------------------------------------------------------------------------|-----------|------------------|------------|----------------|
| Signaling by NOTCH2                                                                        | 0.0007000 | 0.002800         | 19986.00   | 145187.41      |
| Initiation of the second proteolytic cleavage of Notch receptor by receptor-ligand binding | 0.0007000 | 0.002800         | 19986.00   | 145187.41      |
| Activated NOTCH1 signaling in the nucleus                                                  | 0.001550  | 0.004133         | 19969.00   | 129189.85      |
| Signaling by NOTCH1                                                                        | 0.003650  | 0.006320         | 19927.00   | 111851.11      |
| p73 transcription factor network                                                           | 0.003950  | 0.006320         | 19921.00   | 110243.90      |
| Signaling by NOTCH                                                                         | 0.005950  | 0.006914         | 19881.00   | 101877.73      |
| Notch signaling pathway                                                                    | 0.006050  | 0.006914         | 19879.00   | 101536.16      |
| Signal transduction                                                                        | 0.05100   | 0.05100          | 18980.00   | 56483.22       |

**(B)**

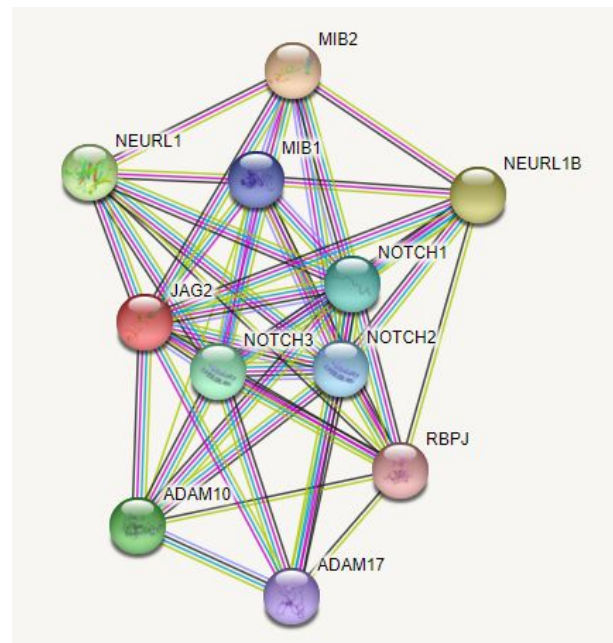

**Supplementary Figure 3**

(A)

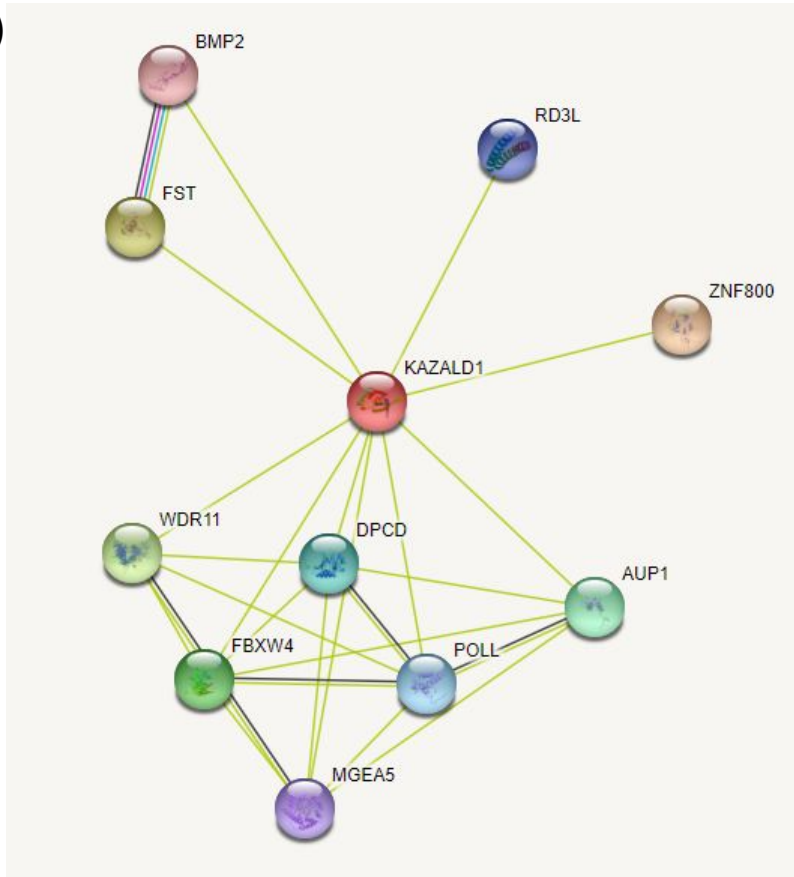

Supplementary Figure 4

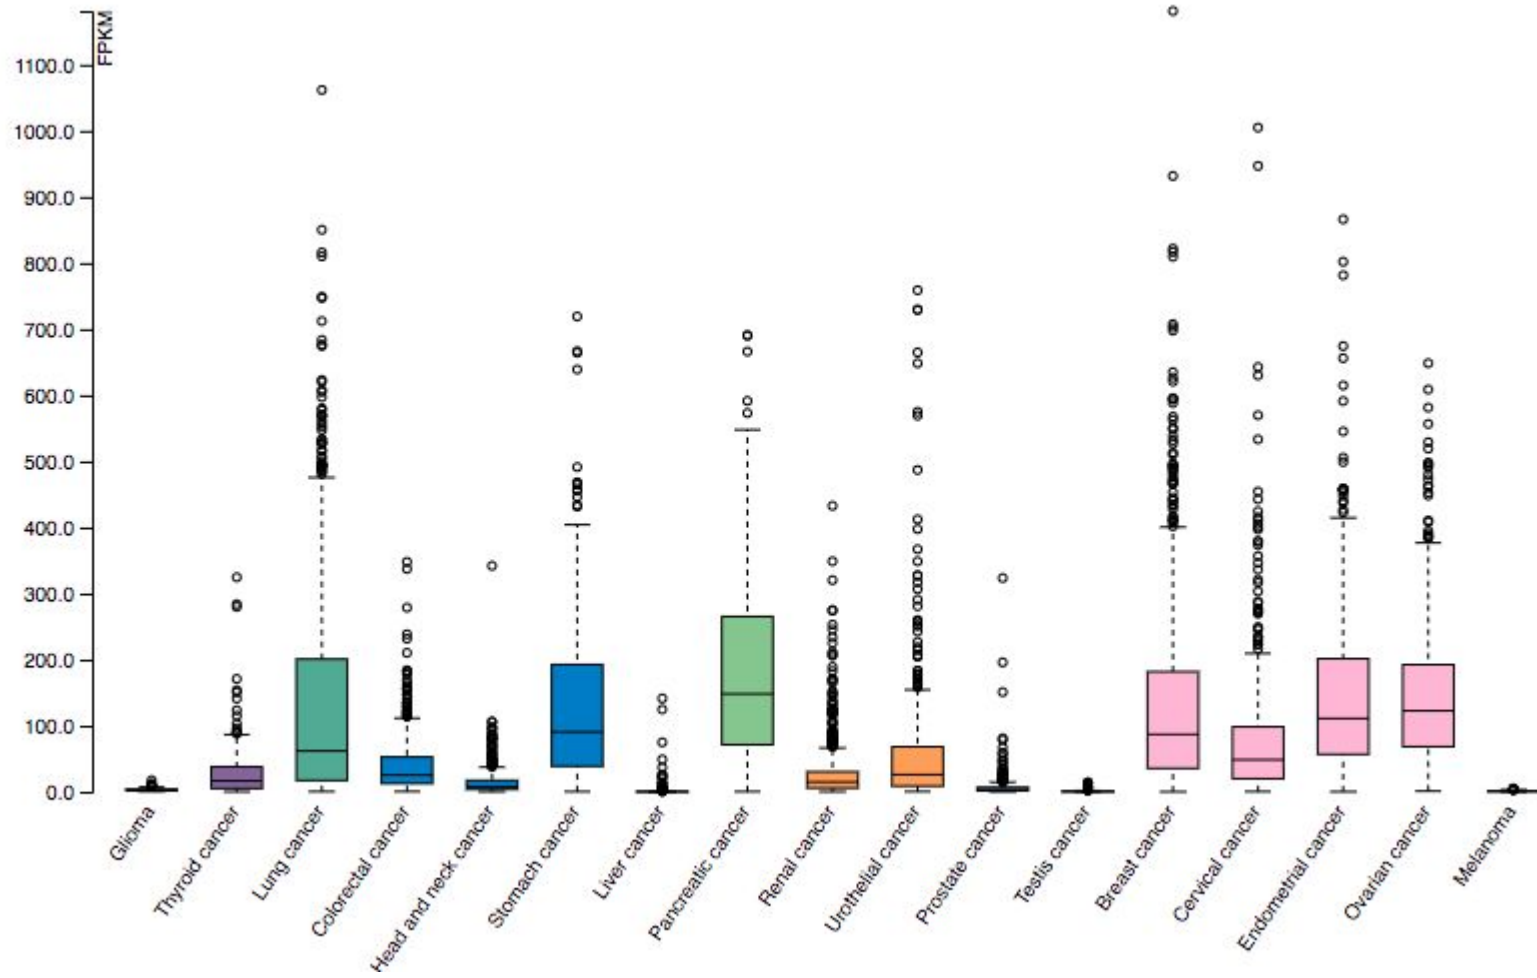

**Supplementary  
Figure 5**

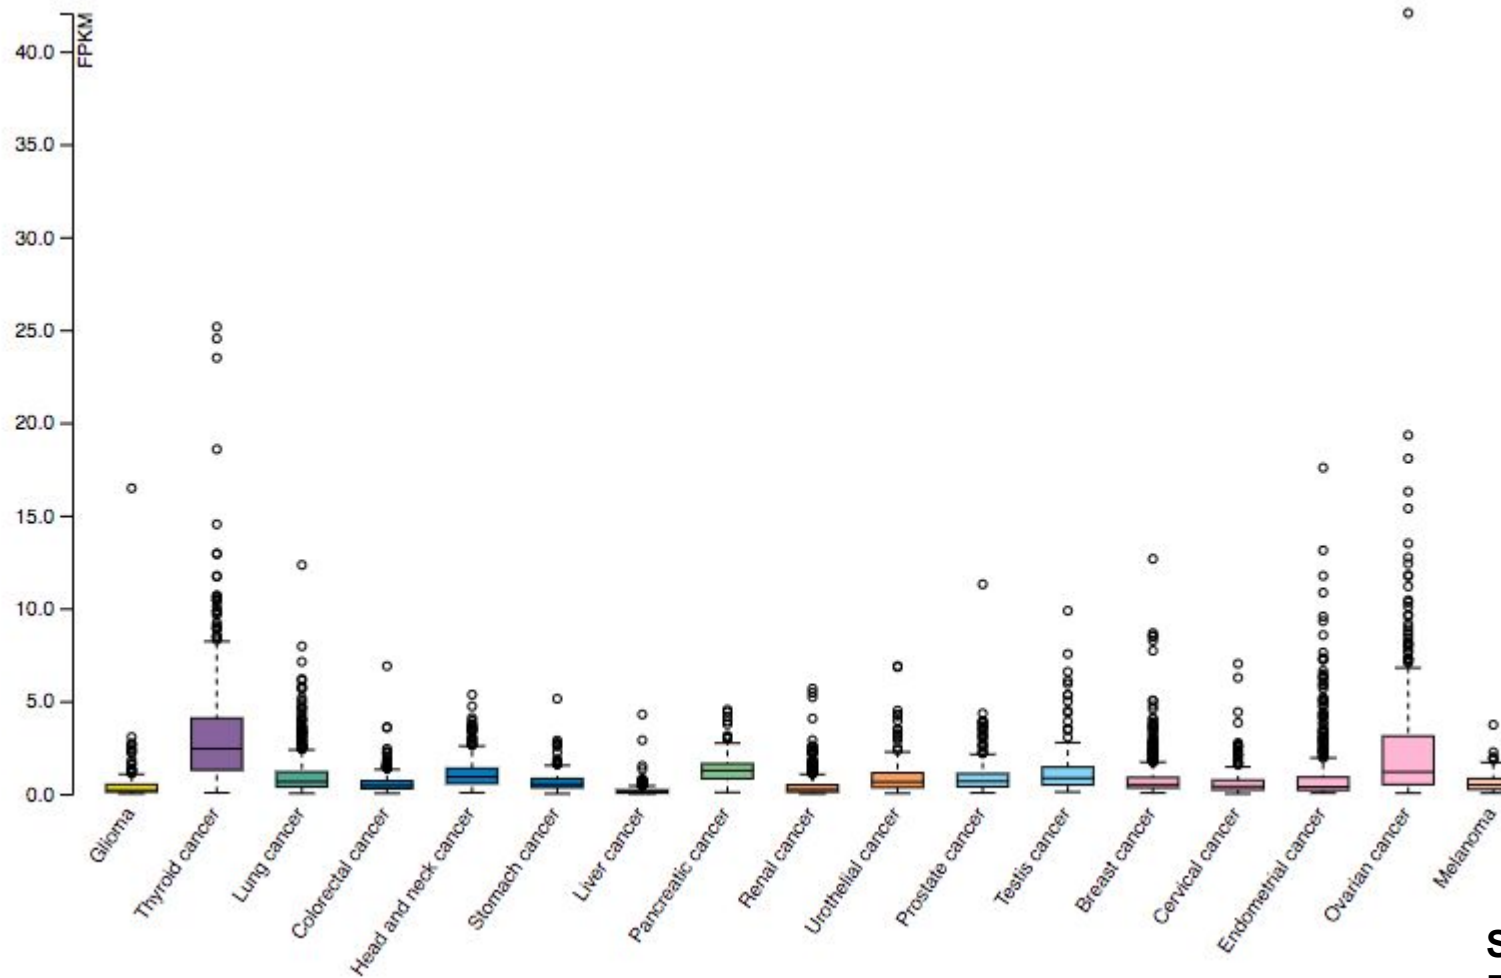

**Supplementary  
Figure 6**

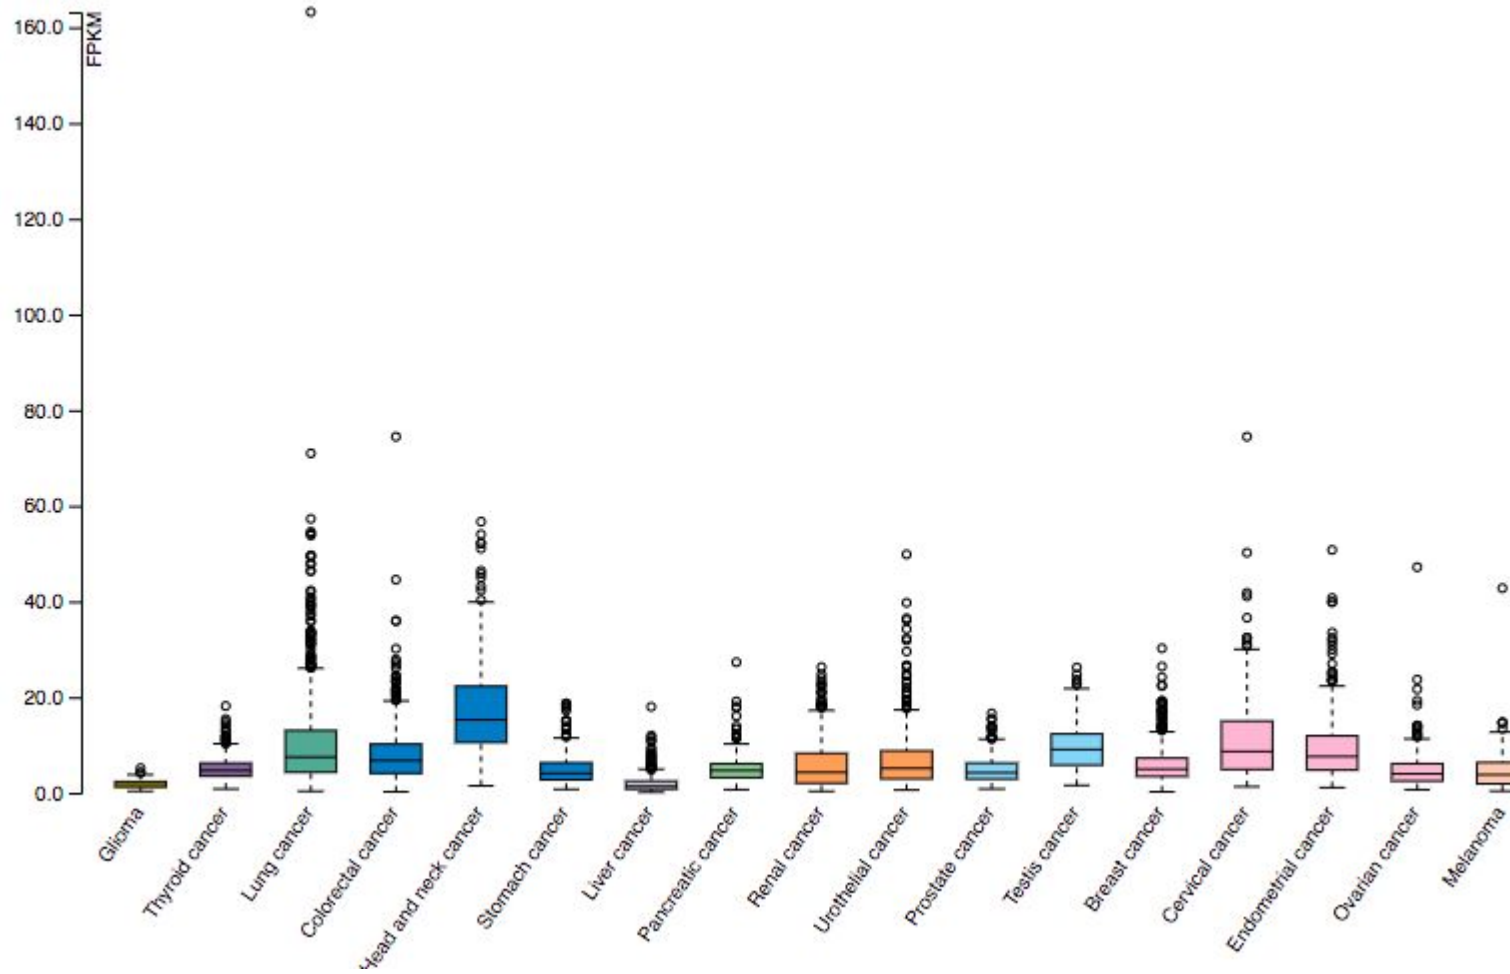

**Supplementary  
Figure 7**

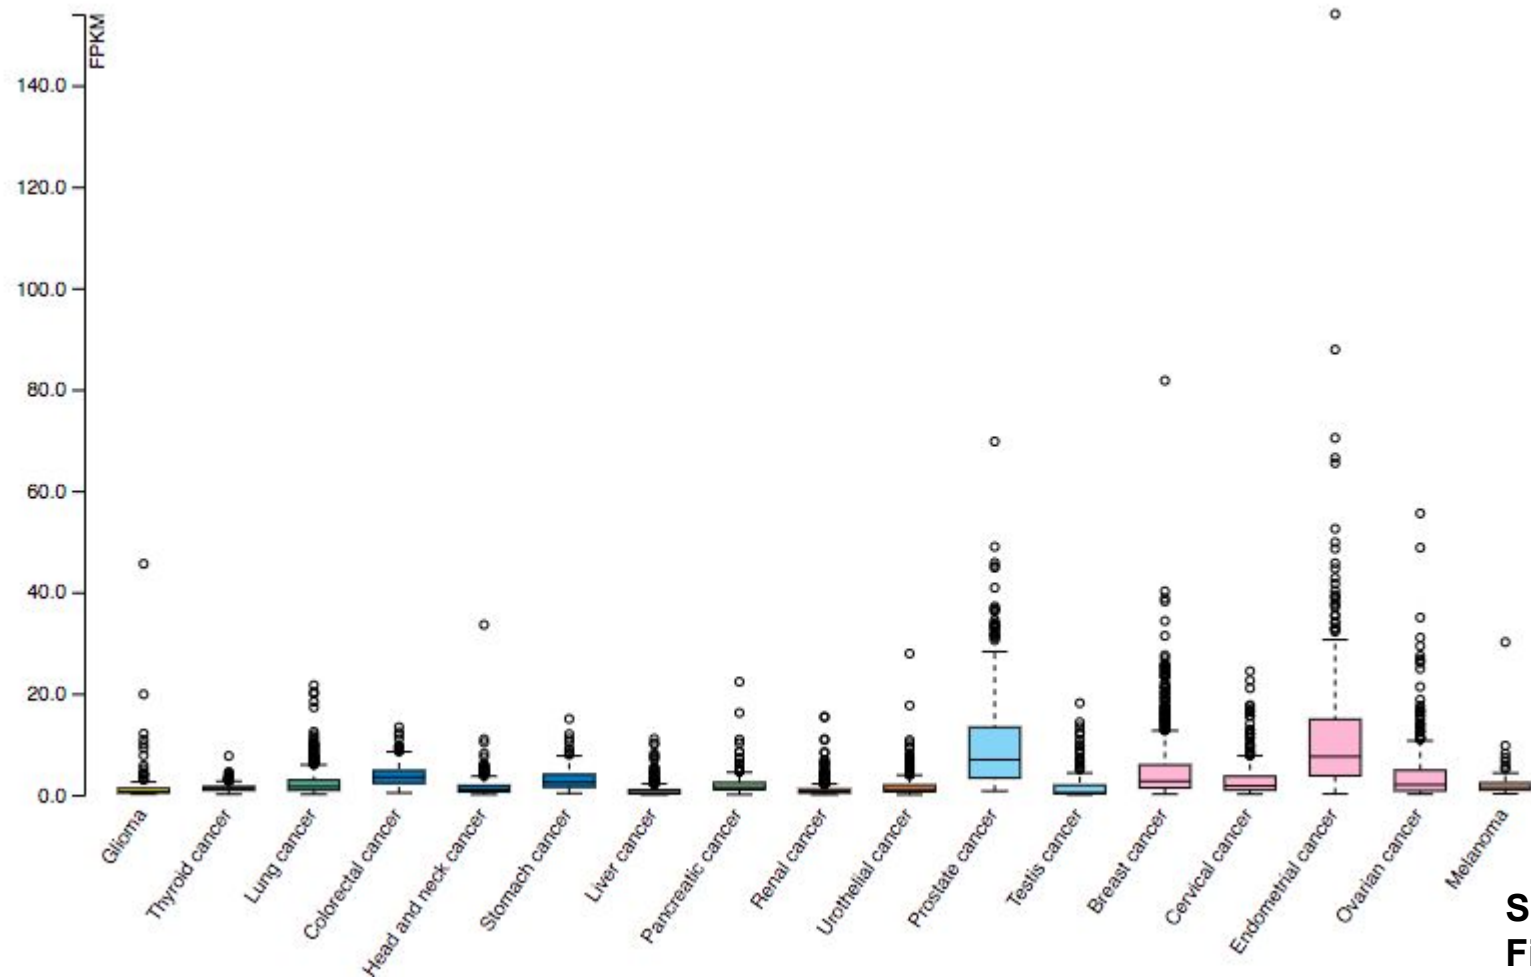

**Supplementary  
Figure 8**



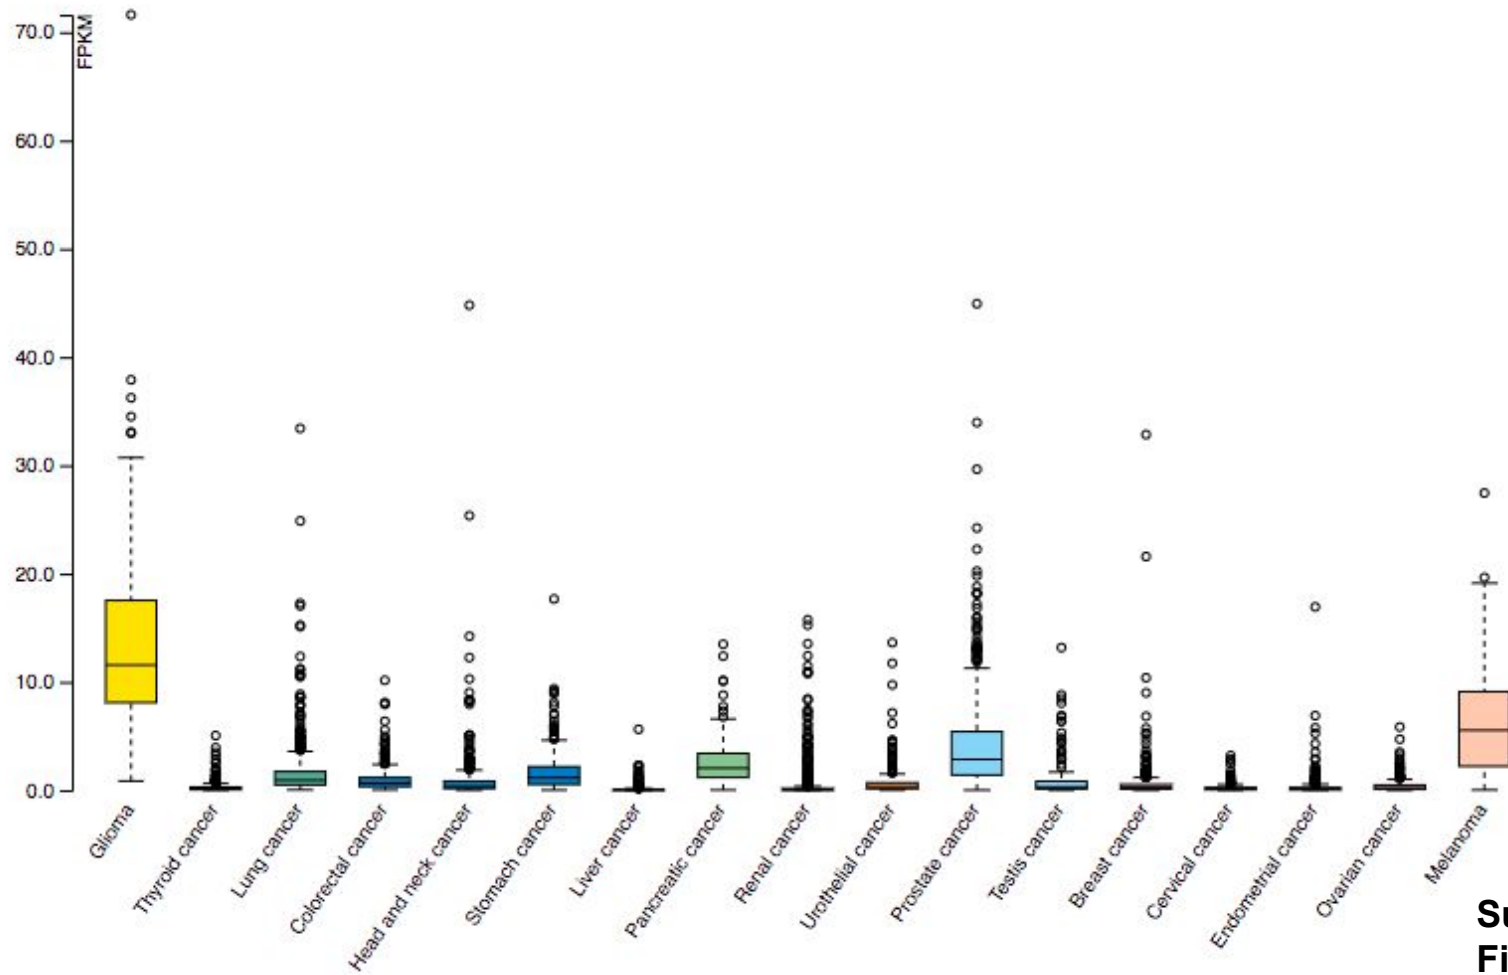

**Supplementary  
Figure 9**

**Supplementary Figure 1.** Functional enrichment analysis of differentially expressed gene, *MUC1*. (A) Significantly enriched terms. Lighter colour represents more significance (smaller p value). (B) Network map of differentially expressed gene *MUC1*. Network nodes and edges indicate proteins and their interactions. Filled network nodes indicate a 3D structure is known.

**Supplementary Figure 2.** Functional enrichment analysis of differentially expressed gene, *COL13A1*. (A) Significantly enriched terms. Lighter colour represents more significance (smaller p value). (B) Network map of differentially expressed gene *COL13A1*. Network nodes and edges indicate proteins and their interactions. Filled network nodes indicate a 3D structure is known.

**Supplementary Figure 3.** Functional enrichment analysis of differentially expressed gene, *JAG2*. (A) Enriched terms. Lighter red colour represents more significance (smaller p value). Grey colour represents non-significant enrichment terms (B) Network map of differentially expressed gene *JAG2*. Network nodes and edges indicate proteins and their interactions. Filled network nodes indicate a 3D structure is known.

**Supplementary Figure 4.** Functional enrichment analysis of differentially expressed gene, *KAZALD1*. (A) Network map of differentially expressed gene *KAZALD1*. Network nodes and edges indicate proteins and their interactions. Filled network nodes indicate that a 3D structure is known.

**Supplementary Figure 5.** Boxplots of *MUC1* mRNA expression levels in 17 different cancer tissues.

Retrieved from The Human Protein Atlas

**Supplementary Figure 6.** Boxplots of *COL13A1* mRNA expression levels in 17 different cancer tissues.

Retrieved from The Human Protein Atlas

**Supplementary Figure 7.** Boxplots of *JAG2* mRNA expression levels in 17 different cancer tissues.

Retrieved from The Human Protein Atlas

**Supplementary Figure 8.** Boxplots of *KAZALDI* mRNA expression levels in 17 different cancer tissues.

Retrieved from The Human Protein Atlas

**Supplementary Figure 9.** Boxplots of *LSAMP* mRNA expression levels in 17 different cancer tissues.

Retrieved from The Human Protein Atlas

List of p values for pairwise comparisons of *MUC1* expression levels between OS cell types.

| <b><i>MUC1</i> pairwise comparisons</b>                    | <b>P Value</b> |
|------------------------------------------------------------|----------------|
| B cells vs. Carcinoma associated fibroblasts               | 0.7649         |
| B cells vs. Endothelial cells                              | >0.9999        |
| B cells vs. Myeloid cells 1                                | >0.9999        |
| B cells vs. Myeloid cells 2                                | 0.9999         |
| B cells vs. NK/T cells                                     | >0.9999        |
| B cells vs. Osteoblastic OS cells                          | <0.0001        |
| B cells vs. Osteoclasts                                    | >0.9999        |
| B cells vs. Plasmocytes                                    | 0.8032         |
| Carcinoma associated fibroblasts vs. Endothelial cells     | 0.6674         |
| Carcinoma associated fibroblasts vs. Myeloid cells 1       | 0.2073         |
| Carcinoma associated fibroblasts vs. Myeloid cells 2       | 0.6563         |
| Carcinoma associated fibroblasts vs. NK/T cells            | 0.1587         |
| Carcinoma associated fibroblasts vs. Osteoblastic OS cells | <0.0001        |
| Carcinoma associated fibroblasts vs. Osteoclasts           | 0.3029         |
| Carcinoma associated fibroblasts vs. Plasmocytes           | >0.9999        |
| Endothelial cells vs. Myeloid cells 1                      | >0.9999        |
| Endothelial cells vs. Myeloid cells 2                      | 0.9995         |
| Endothelial cells vs. NK/T cells                           | >0.9999        |
| Endothelial cells vs. Osteoblastic OS cells                | <0.0001        |
| Endothelial cells vs. Osteoclasts                          | >0.9999        |
| Endothelial cells vs. Plasmocytes                          | 0.7174         |
| Myeloid cells 1 vs. Myeloid cells 2                        | 0.9982         |
| Myeloid cells 1 vs. NK/T cells                             | >0.9999        |
| Myeloid cells 1 vs. Osteoblastic OS cells                  | <0.0001        |
| Myeloid cells 1 vs. Osteoclasts                            | >0.9999        |
| Myeloid cells 1 vs. Plasmocytes                            | 0.3051         |
| Myeloid cells 2 vs. NK/T cells                             | 0.9862         |
| Myeloid cells 2 vs. Osteoblastic OS cells                  | <0.0001        |
| Myeloid cells 2 vs. Osteoclasts                            | 0.9958         |
| Myeloid cells 2 vs. Plasmocytes                            | 0.7417         |
| NK/T cells vs. Osteoblastic OS cells                       | <0.0001        |
| NK/T cells vs. Osteoclasts                                 | >0.9999        |
| NK/T cells vs. Plasmocytes                                 | 0.2383         |
| Osteoblastic OS cells vs. Osteoclasts                      | <0.0001        |
| Osteoblastic OS cells vs. Plasmocytes                      | <0.0001        |
| Osteoclasts vs. Plasmocytes                                | 0.386          |

List of p values for pairwise comparisons of *COL13A1* expression levels between OS cell types.

| <b><i>COL13A1</i> pairwise comparisons</b>                 | <b>P Value</b> |
|------------------------------------------------------------|----------------|
| B cells vs. Carcinoma associated fibroblasts               | <0.0001        |
| B cells vs. Endothelial cells                              | <0.0001        |
| B cells vs. Myeloid cells 1                                | >0.9999        |
| B cells vs. Myeloid cells 2                                | >0.9999        |
| B cells vs. NK/T cells                                     | >0.9999        |
| B cells vs. Osteoblastic OS cells                          | <0.0001        |
| B cells vs. Osteoclasts                                    | >0.9999        |
| B cells vs. Plasmocytes                                    | >0.9999        |
| Carcinoma associated fibroblasts vs. Endothelial cells     | 0.9208         |
| Carcinoma associated fibroblasts vs. Myeloid cells 1       | <0.0001        |
| Carcinoma associated fibroblasts vs. Myeloid cells 2       | <0.0001        |
| Carcinoma associated fibroblasts vs. NK/T cells            | <0.0001        |
| Carcinoma associated fibroblasts vs. Osteoblastic OS cells | <0.0001        |
| Carcinoma associated fibroblasts vs. Osteoclasts           | <0.0001        |
| Carcinoma associated fibroblasts vs. Plasmocytes           | <0.0001        |
| Endothelial cells vs. Myeloid cells 1                      | <0.0001        |
| Endothelial cells vs. Myeloid cells 2                      | <0.0001        |
| Endothelial cells vs. NK/T cells                           | <0.0001        |
| Endothelial cells vs. Osteoblastic OS cells                | <0.0001        |
| Endothelial cells vs. Osteoclasts                          | <0.0001        |
| Endothelial cells vs. Plasmocytes                          | <0.0001        |
| Myeloid cells 1 vs. Myeloid cells 2                        | >0.9999        |
| Myeloid cells 1 vs. NK/T cells                             | >0.9999        |
| Myeloid cells 1 vs. Osteoblastic OS cells                  | <0.0001        |
| Myeloid cells 1 vs. Osteoclasts                            | 0.9998         |
| Myeloid cells 1 vs. Plasmocytes                            | >0.9999        |
| Myeloid cells 2 vs. NK/T cells                             | >0.9999        |
| Myeloid cells 2 vs. Osteoblastic OS cells                  | <0.0001        |
| Myeloid cells 2 vs. Osteoclasts                            | >0.9999        |
| Myeloid cells 2 vs. Plasmocytes                            | >0.9999        |
| NK/T cells vs. Osteoblastic OS cells                       | <0.0001        |
| NK/T cells vs. Osteoclasts                                 | >0.9999        |
| NK/T cells vs. Plasmocytes                                 | >0.9999        |
| Osteoblastic OS cells vs. Osteoclasts                      | <0.0001        |
| Osteoblastic OS cells vs. Plasmocytes                      | <0.0001        |
| Osteoclasts vs. Plasmocytes                                | >0.9999        |

List of p values for pairwise comparisons of *JAG2* expression levels between OS cell types.

| <b><i>JAG2</i> pairwise comparisons</b>                    | <b>P Value</b> |
|------------------------------------------------------------|----------------|
| B cells vs. Carcinoma associated fibroblasts               | >0.9999        |
| B cells vs. Endothelial cells                              | <0.0001        |
| B cells vs. Myeloid cells 1                                | >0.9999        |
| B cells vs. Myeloid cells 2                                | >0.9999        |
| B cells vs. NK/T cells                                     | 0.9998         |
| B cells vs. Osteoblastic OS cells                          | <0.0001        |
| B cells vs. Osteoclasts                                    | 0.999          |
| B cells vs. Plasmocytes                                    | >0.9999        |
| Carcinoma associated fibroblasts vs. Endothelial cells     | <0.0001        |
| Carcinoma associated fibroblasts vs. Myeloid cells 1       | 0.9997         |
| Carcinoma associated fibroblasts vs. Myeloid cells 2       | >0.9999        |
| Carcinoma associated fibroblasts vs. NK/T cells            | >0.9999        |
| Carcinoma associated fibroblasts vs. Osteoblastic OS cells | <0.0001        |
| Carcinoma associated fibroblasts vs. Osteoclasts           | >0.9999        |
| Carcinoma associated fibroblasts vs. Plasmocytes           | >0.9999        |
| Endothelial cells vs. Myeloid cells 1                      | <0.0001        |
| Endothelial cells vs. Myeloid cells 2                      | <0.0001        |
| Endothelial cells vs. NK/T cells                           | <0.0001        |
| Endothelial cells vs. Osteoblastic OS cells                | <0.0001        |
| Endothelial cells vs. Osteoclasts                          | <0.0001        |
| Endothelial cells vs. Plasmocytes                          | <0.0001        |
| Myeloid cells 1 vs. Myeloid cells 2                        | >0.9999        |
| Myeloid cells 1 vs. NK/T cells                             | 0.985          |
| Myeloid cells 1 vs. Osteoblastic OS cells                  | <0.0001        |
| Myeloid cells 1 vs. Osteoclasts                            | 0.9806         |
| Myeloid cells 1 vs. Plasmocytes                            | >0.9999        |
| Myeloid cells 2 vs. NK/T cells                             | >0.9999        |
| Myeloid cells 2 vs. Osteoblastic OS cells                  | <0.0001        |
| Myeloid cells 2 vs. Osteoclasts                            | 0.999          |
| Myeloid cells 2 vs. Plasmocytes                            | >0.9999        |
| NK/T cells vs. Osteoblastic OS cells                       | <0.0001        |
| NK/T cells vs. Osteoclasts                                 | >0.9999        |
| NK/T cells vs. Plasmocytes                                 | >0.9999        |
| Osteoblastic OS cells vs. Osteoclasts                      | <0.0001        |
| Osteoblastic OS cells vs. Plasmocytes                      | <0.0001        |
| Osteoclasts vs. Plasmocytes                                | 0.9996         |

List of p values for pairwise comparisons of *KAZALDI* expression levels between OS cell types.

| <b><i>KAZALDI</i> pairwise comparisons</b>                 | <b>P Value</b> |
|------------------------------------------------------------|----------------|
| B cells vs. Carcinoma associated fibroblasts               | <0.0001        |
| B cells vs. Endothelial cells                              | >0.9999        |
| B cells vs. Myeloid cells 1                                | >0.9999        |
| B cells vs. Myeloid cells 2                                | >0.9999        |
| B cells vs. NK/T cells                                     | >0.9999        |
| B cells vs. Osteoblastic OS cells                          | <0.0001        |
| B cells vs. Osteoclasts                                    | >0.9999        |
| B cells vs. Plasmocytes                                    | >0.9999        |
| Carcinoma associated fibroblasts vs. Endothelial cells     | <0.0001        |
| Carcinoma associated fibroblasts vs. Myeloid cells 1       | <0.0001        |
| Carcinoma associated fibroblasts vs. Myeloid cells 2       | <0.0001        |
| Carcinoma associated fibroblasts vs. NK/T cells            | <0.0001        |
| Carcinoma associated fibroblasts vs. Osteoblastic OS cells | >0.9999        |
| Carcinoma associated fibroblasts vs. Osteoclasts           | <0.0001        |
| Carcinoma associated fibroblasts vs. Plasmocytes           | <0.0001        |
| Endothelial cells vs. Myeloid cells 1                      | >0.9999        |
| Endothelial cells vs. Myeloid cells 2                      | >0.9999        |
| Endothelial cells vs. NK/T cells                           | >0.9999        |
| Endothelial cells vs. Osteoblastic OS cells                | <0.0001        |
| Endothelial cells vs. Osteoclasts                          | >0.9999        |
| Endothelial cells vs. Plasmocytes                          | >0.9999        |
| Myeloid cells 1 vs. Myeloid cells 2                        | >0.9999        |
| Myeloid cells 1 vs. NK/T cells                             | >0.9999        |
| Myeloid cells 1 vs. Osteoblastic OS cells                  | <0.0001        |
| Myeloid cells 1 vs. Osteoclasts                            | >0.9999        |
| Myeloid cells 1 vs. Plasmocytes                            | >0.9999        |
| Myeloid cells 2 vs. NK/T cells                             | >0.9999        |
| Myeloid cells 2 vs. Osteoblastic OS cells                  | <0.0001        |
| Myeloid cells 2 vs. Osteoclasts                            | >0.9999        |
| Myeloid cells 2 vs. Plasmocytes                            | >0.9999        |
| NK/T cells vs. Osteoblastic OS cells                       | <0.0001        |
| NK/T cells vs. Osteoclasts                                 | 0.9998         |
| NK/T cells vs. Plasmocytes                                 | 0.9993         |
| Osteoblastic OS cells vs. Osteoclasts                      | <0.0001        |
| Osteoblastic OS cells vs. Plasmocytes                      | <0.0001        |
| Osteoclasts vs. Plasmocytes                                | >0.9999        |

List of p values for pairwise comparisons of *LSAMP* expression levels between OS cell types.

| <b><i>LSAMP</i> pairwise comparisons</b>                   | <b>P Value</b> |
|------------------------------------------------------------|----------------|
| B cells vs. Carcinoma associated fibroblasts               | <0.0001        |
| B cells vs. Endothelial cells                              | >0.9999        |
| B cells vs. Myeloid cells 1                                | >0.9999        |
| B cells vs. Myeloid cells 2                                | >0.9999        |
| B cells vs. NK/T cells                                     | >0.9999        |
| B cells vs. Osteoblastic OS cells                          | <0.0001        |
| B cells vs. Osteoclasts                                    | >0.9999        |
| B cells vs. Plasmocytes                                    | >0.9999        |
| Carcinoma associated fibroblasts vs. Endothelial cells     | <0.0001        |
| Carcinoma associated fibroblasts vs. Myeloid cells 1       | <0.0001        |
| Carcinoma associated fibroblasts vs. Myeloid cells 2       | <0.0001        |
| Carcinoma associated fibroblasts vs. NK/T cells            | <0.0001        |
| Carcinoma associated fibroblasts vs. Osteoblastic OS cells | <0.0001        |
| Carcinoma associated fibroblasts vs. Osteoclasts           | <0.0001        |
| Carcinoma associated fibroblasts vs. Plasmocytes           | <0.0001        |
| Endothelial cells vs. Myeloid cells 1                      | >0.9999        |
| Endothelial cells vs. Myeloid cells 2                      | >0.9999        |
| Endothelial cells vs. NK/T cells                           | >0.9999        |
| Endothelial cells vs. Osteoblastic OS cells                | <0.0001        |
| Endothelial cells vs. Osteoclasts                          | >0.9999        |
| Endothelial cells vs. Plasmocytes                          | >0.9999        |
| Myeloid cells 1 vs. Myeloid cells 2                        | >0.9999        |
| Myeloid cells 1 vs. NK/T cells                             | >0.9999        |
| Myeloid cells 1 vs. Osteoblastic OS cells                  | <0.0001        |
| Myeloid cells 1 vs. Osteoclasts                            | >0.9999        |
| Myeloid cells 1 vs. Plasmocytes                            | >0.9999        |
| Myeloid cells 2 vs. NK/T cells                             | >0.9999        |
| Myeloid cells 2 vs. Osteoblastic OS cells                  | <0.0001        |
| Myeloid cells 2 vs. Osteoclasts                            | >0.9999        |
| Myeloid cells 2 vs. Plasmocytes                            | >0.9999        |
| NK/T cells vs. Osteoblastic OS cells                       | <0.0001        |
| NK/T cells vs. Osteoclasts                                 | >0.9999        |
| NK/T cells vs. Plasmocytes                                 | >0.9999        |
| Osteoblastic OS cells vs. Osteoclasts                      | <0.0001        |
| Osteoblastic OS cells vs. Plasmocytes                      | <0.0001        |
| Osteoclasts vs. Plasmocytes                                | >0.9999        |
